# Supplementary material for: CD169 Defines Activated CD14+ Monocytes With Enhanced CD8+ T Cell Activation Capacity
Source: PubMed Central journal article supplement (PMC8356644; doi:10.3389/fimmu.2021.697840), 2021-07-28
Supplement: DataSheet_1.pdf [file DataSheet_1.pdf]

*Supplementary Material*

**Supplementary Figures & Tables**

# 1 Supplementary Figures

**Figure S1**

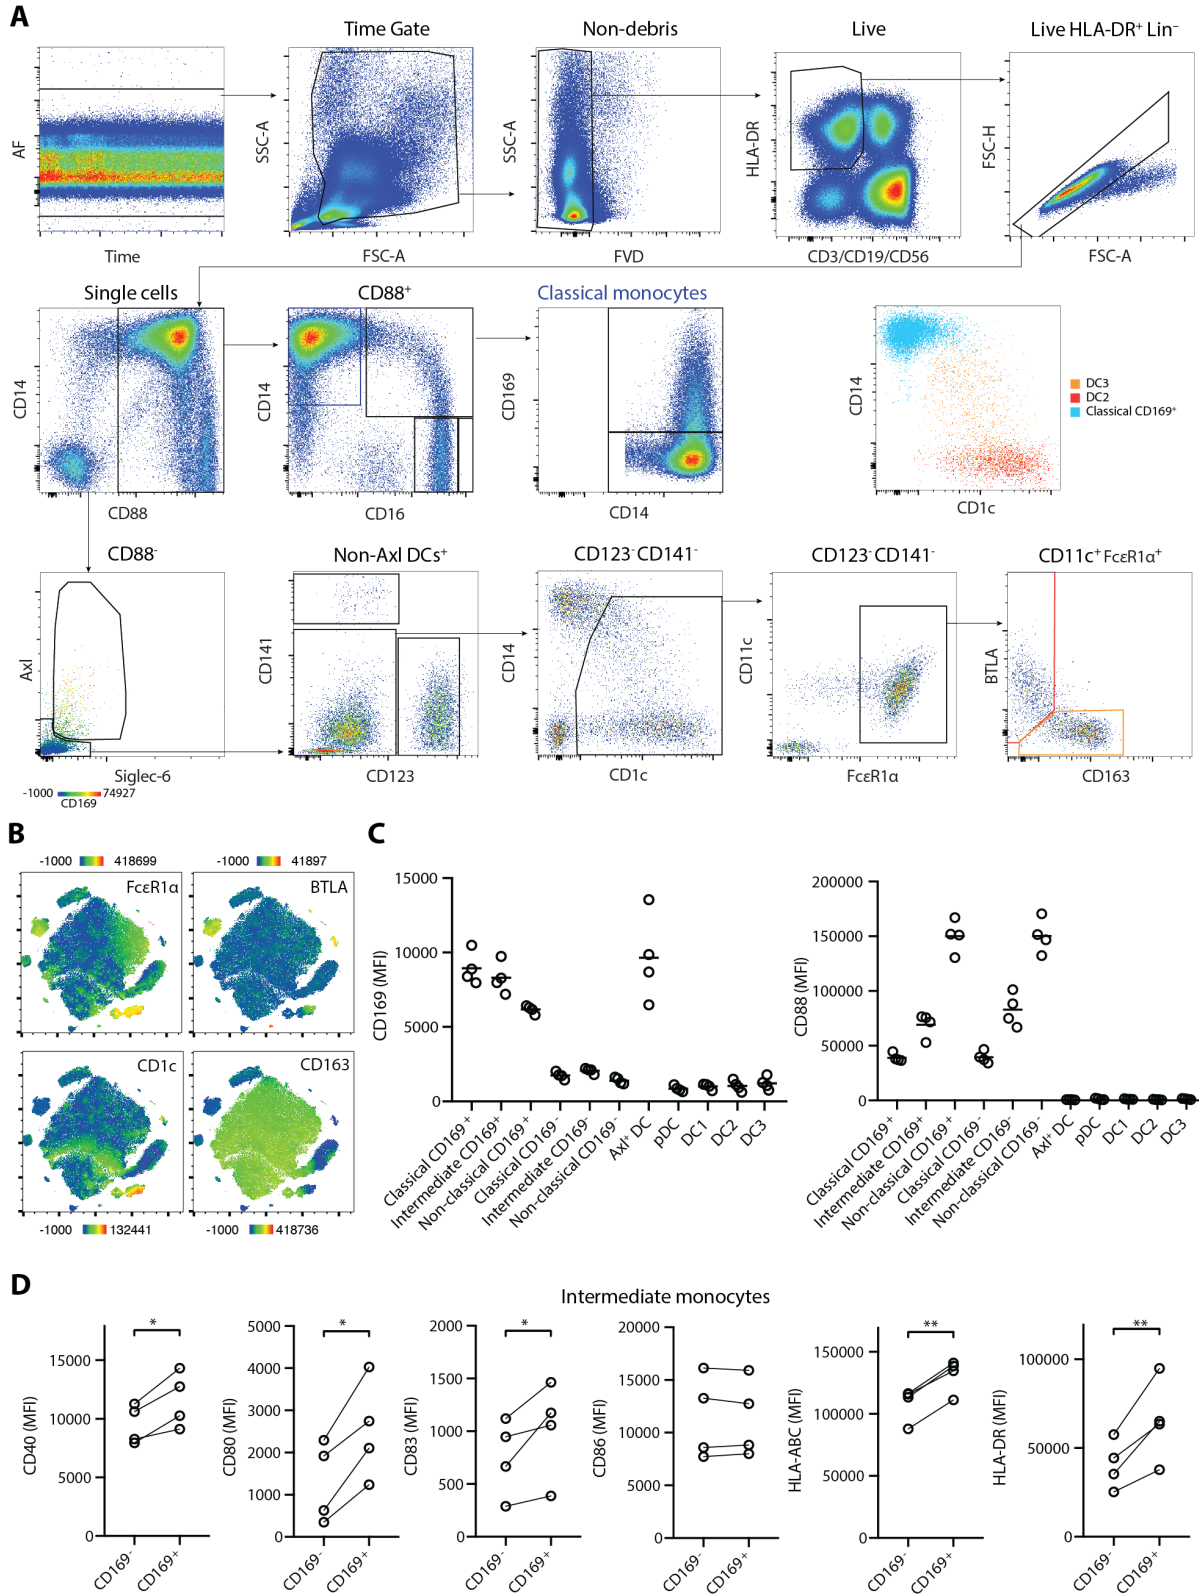

**Figure S1. CD14<sup>+</sup> CD169<sup>+</sup> monocytes display enhanced maturation status.** (A) Gating strategy to define CD88<sup>+</sup> monocytes and CD88<sup>-</sup> dendritic cells (DCs) populations within HLA-DR<sup>+</sup> Lin(CD3/CD19/CD56)<sup>-</sup> cells. Monocytes are repartitioned as classical (CD14<sup>+</sup> CD16<sup>-</sup>), intermediate (CD14<sup>+</sup> CD16<sup>+</sup>), and non-classical (CD14<sup>-</sup> CD16<sup>+</sup>) monocytes. The DC populations comprise of Axl<sup>+</sup> DC (Axl<sup>+</sup> Siglec-6<sup>+</sup>), plasmacytoid DC (pDC, CD123<sup>+</sup>), DC1 (CD141<sup>+</sup>), DC2 (CD1c<sup>+</sup> BTLA<sup>+</sup> CD163<sup>-</sup>), and DC3 (CD1c<sup>+</sup> BTLA<sup>-</sup> CD163<sup>+</sup>). DC3 is distinguishable from monocytes by CD88<sup>-</sup> FcεRIα<sup>+</sup> expression. (B) The expression of FcεRIα, CD1c, BTLA, and CD163 on tSNE plots. (C) Expression of CD169 and CD88 in monocytes and DC subsets (*n* = 4). (D) Expression of maturation markers comparing CD169<sup>+</sup> and CD169<sup>-</sup> intermediate monocytes (*n* = 4). Paired t-tests were used. \* *P* < 0.05, \*\* *P* < 0.01.

**Figure S2**

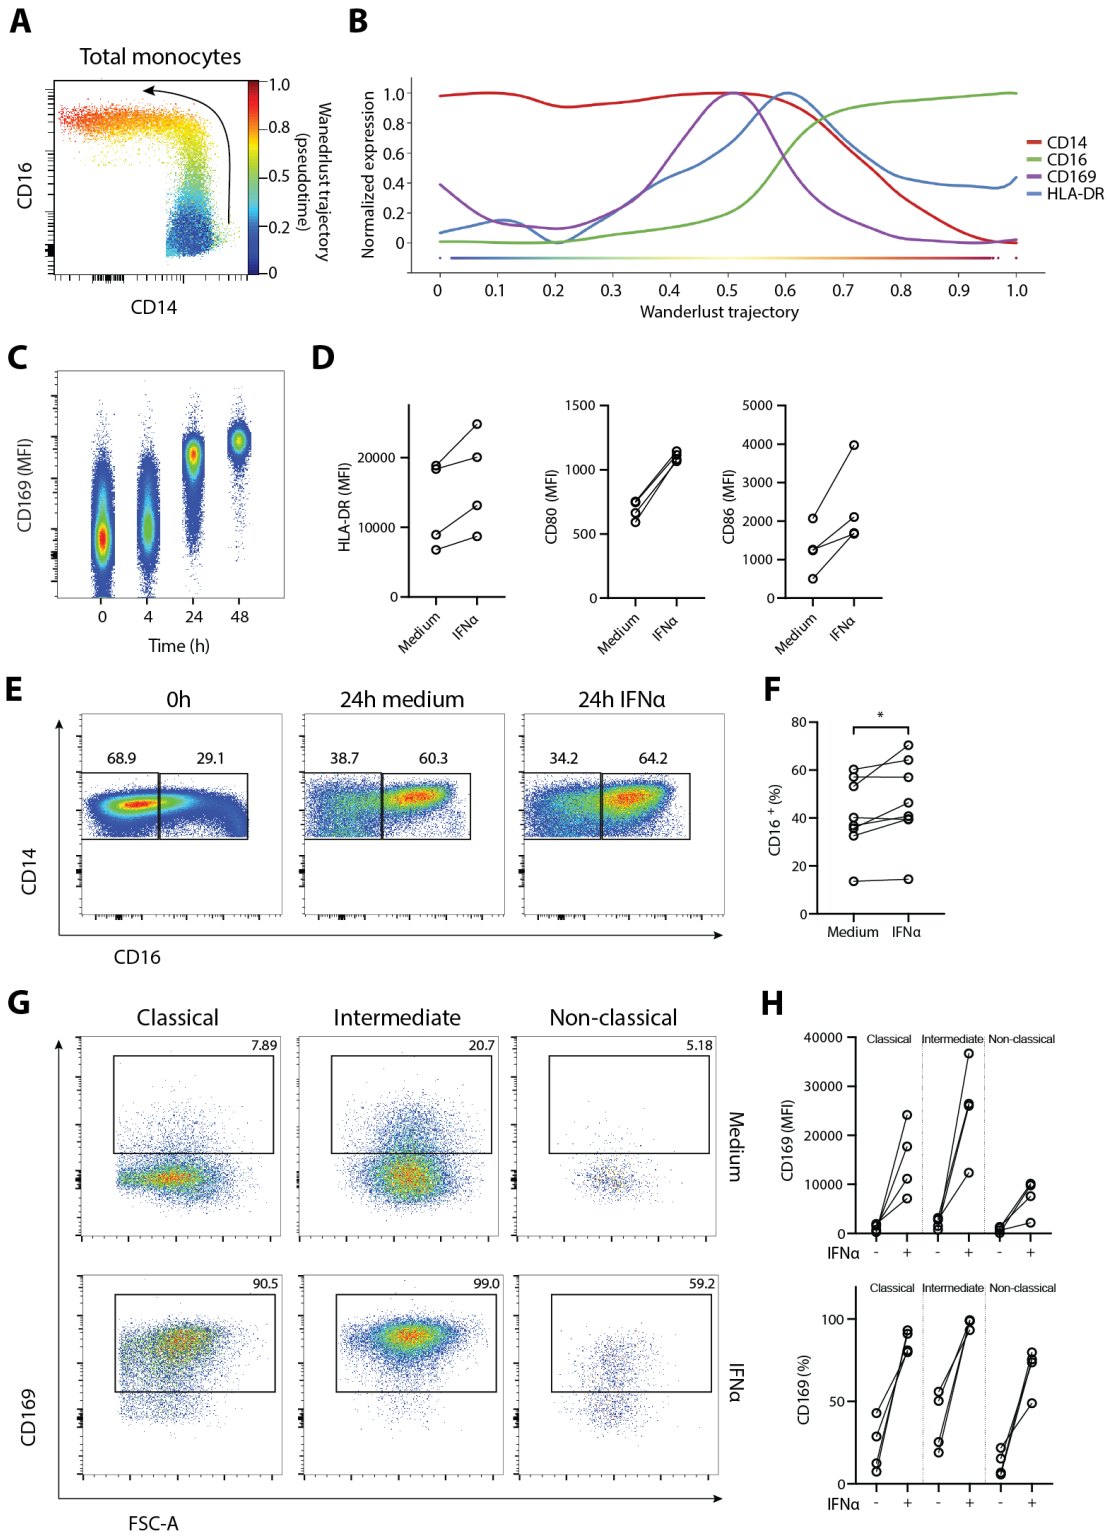

**Figure S2**

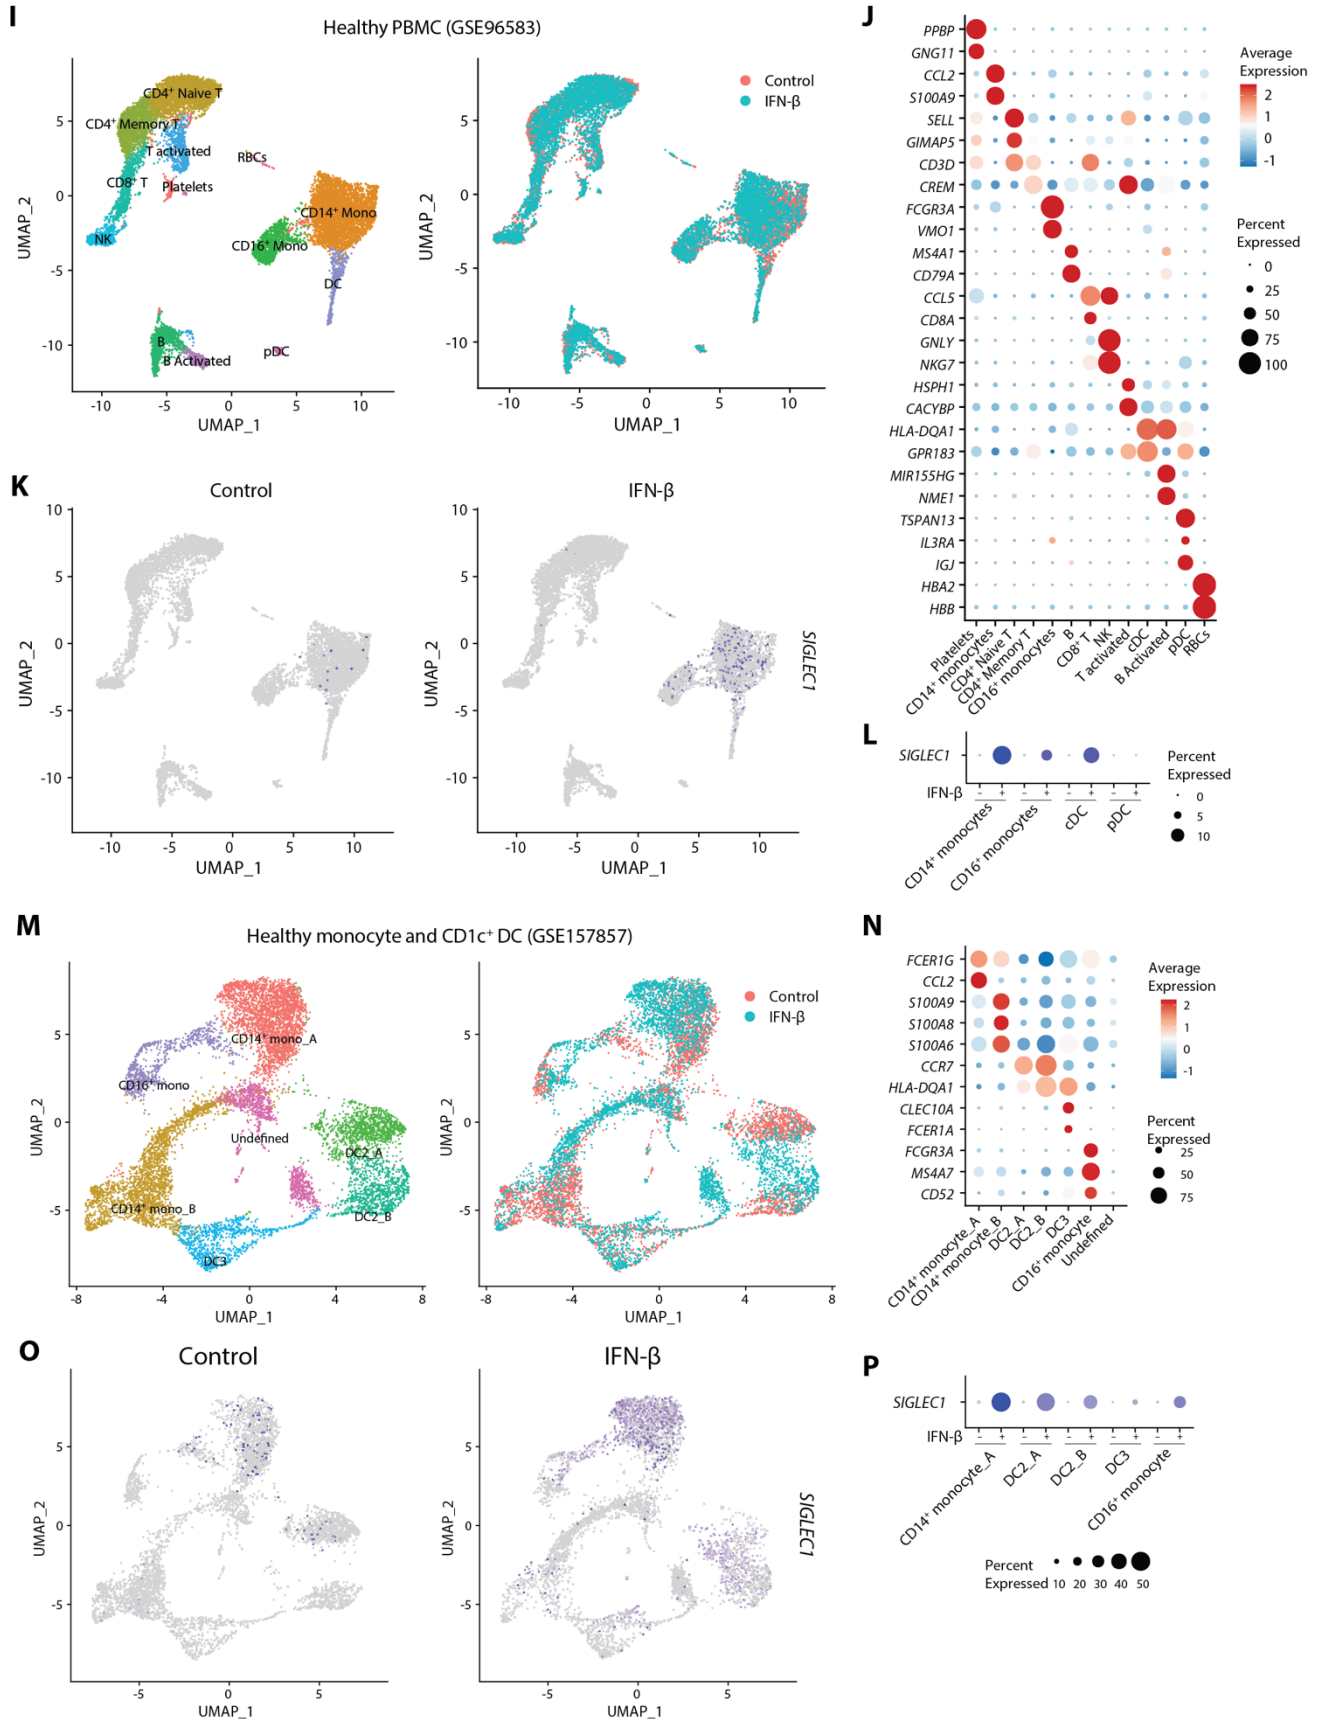

**Figure S2. CD169 expression in monocytes is driven by IFN- $\alpha$ .** (A,B) Wanderlust trajectory analysis of monocyte population using CD14<sup>+</sup> CD169<sup>-</sup> monocytes as starting population overlaid by conventional gating of monocyte subsets. CD14<sup>+</sup> CD169<sup>-</sup> cells were used for input and the following markers were used: CD163, CD14, CD11c, HLA-DR, CD16, CD169, CD141, CD88, and CD1c. (A) Example of development trajectory of classical to intermediate to non-classical monocyte populations. (B) Wanderlust trajectory plots showing normalized expression of CD14, CD16, CD169, and HLA-DR. (C) CD14<sup>+</sup> monocytes were isolated and treated with 1,000 IU/ml IFN $\alpha$  for the indicated time-points. Representative plots showing CD169 expression are shown. (D) Expression of HLA-DR, CD80, and CD86 of CD14<sup>+</sup> monocytes treated with medium or 1,000 IU/ml IFN $\alpha$  for 24h ( $n = 4$ ). (E,F) CD16 expression within CD14<sup>+</sup> monocytes of untreated, medium-treated, and IFN $\alpha$ -treated shown as (E) representative plots and (F) quantification ( $n = 8$ ). Paired t-test, \*  $P < 0.05$ . (G,H) Monocytes were isolated using percoll density gradient and cultured with medium or 1,000 IU/ml IFN $\alpha$ . Expression of CD169 on classical (CD14<sup>+</sup> CD16<sup>-</sup>), intermediate (CD14<sup>+</sup> CD16<sup>+</sup>), and non-classical (CD14<sup>-</sup> CD16<sup>+</sup>) monocytes is shown as (G) representative plots and (H) quantification ( $n = 4$ ). (I-L) Analysis of public sc-RNAseq dataset of PBMCs from healthy controls treated with or without IFN $\beta$  for 6 h (GSE96583) [1] using Seurat Integration pipeline [2]. pDC, plasmacytoid DC; cDC, conventional DC; RBC, red blood cells. (I) UMAP analysis showing distribution of control and stimulated cells across clusters. (J) Dotplot showing gene expression of known lineage markers across clusters. (K,L) Expression of *SIGLEC1* on control or IFN $\beta$ -treated cells shown as (K) UMAP analysis and (L) dotplot. (M-P) Analysis of public sc-RNAseq dataset of isolated monocytes and CD1c<sup>+</sup> DCs from healthy controls treated with or without IFN $\beta$  for 18 h (GSE157857) [3]. (M) UMAP analysis showing distribution of control and stimulated cells across clusters. (N) Dotplot showing gene expression of known lineage markers across clusters. (O,P) Expression of *SIGLEC1* on control or IFN $\beta$ -treated cells shown as (O) UMAP analysis and (P) dotplot.

**Figure S3**

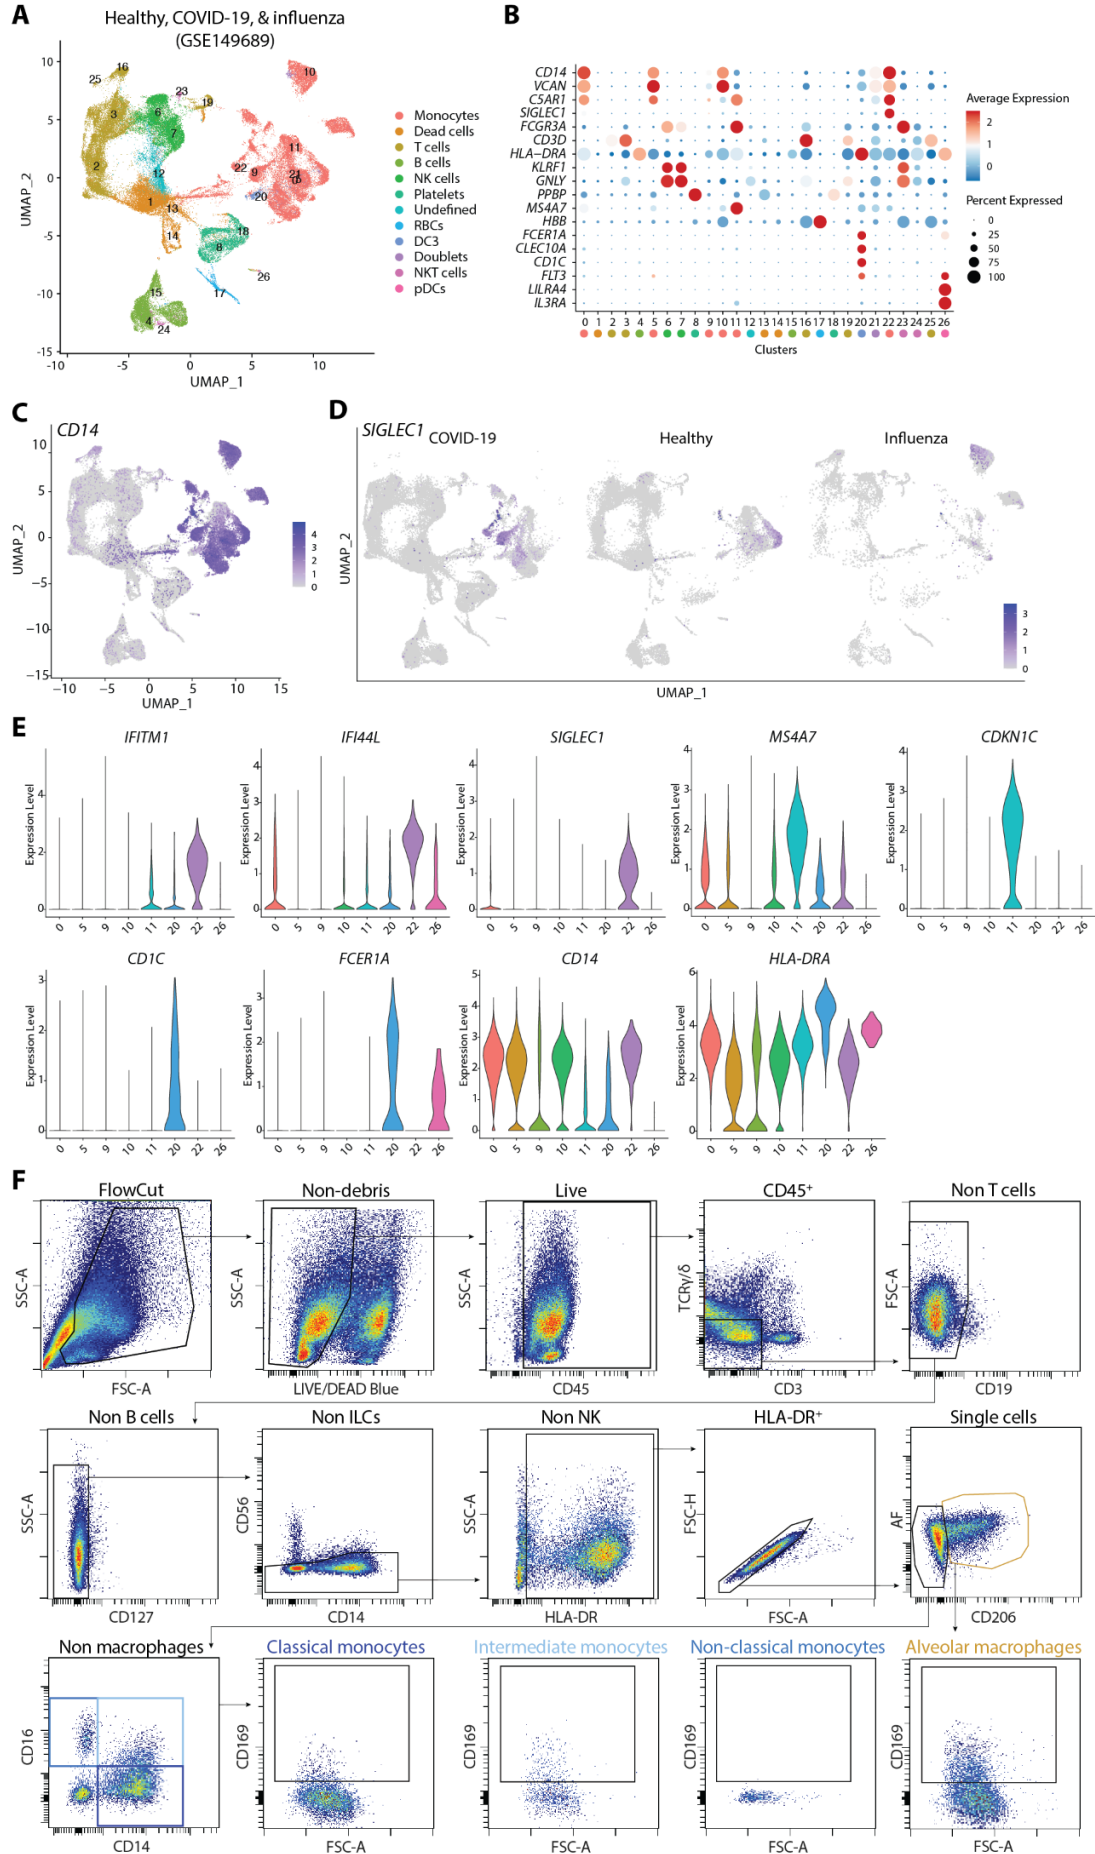

**Figure S3. CD14<sup>+</sup> CD169<sup>+</sup> monocytes are present in COVID-19 patients and exhibit activated phenotype.** (A) Analysis of public sc-RNaseq dataset of PBMCs from patients with COVID-19 ( $n = 9$ ), severe influenza ( $n = 5$ ) and healthy controls ( $n = 4$ ) using Seurat pipeline and projected onto UMAP. (B) Dotplot showing gene expression of known lineage markers across clusters. (C) UMAP analysis showing *CD14* expression in all groups. (D) UMAP analysis showing *SIGLEC1* expression in different groups. (E) Violin plots of selected genes (*IFITM1*, *IFI44L*, *SIGLEC1*) defining cluster 22 (see **Table S3**), non-classical monocytes markers *MS4A7* and *CDKN1C*, DC3 markers *CD1C* and *FCERIA* in monocytes and DC clusters, *CD14*, and *HLA-DRA*. (F) Gating strategy to define CD169<sup>+</sup> monocytes or macrophages within HLA-DR<sup>+</sup> Lin(CD3/CD19/CD56/CD127)<sup>-</sup> cells of bronchoalveolar lavage fluid from COVID-19 patients adapted from Saris et al [4]. Alveolar macrophages are defined as autofluorescence (AF)<sup>high</sup> CD206<sup>+</sup> Lin<sup>-</sup> cells. CD206<sup>-</sup> cells are further repartitioned based on CD14 and CD16 to identify classical (CD14<sup>+</sup> CD16<sup>-</sup>), intermediate (CD14<sup>+</sup> CD16<sup>+</sup>), and non-classical monocytes (CD14<sup>-</sup> CD16<sup>+</sup>).



**Figure S4**

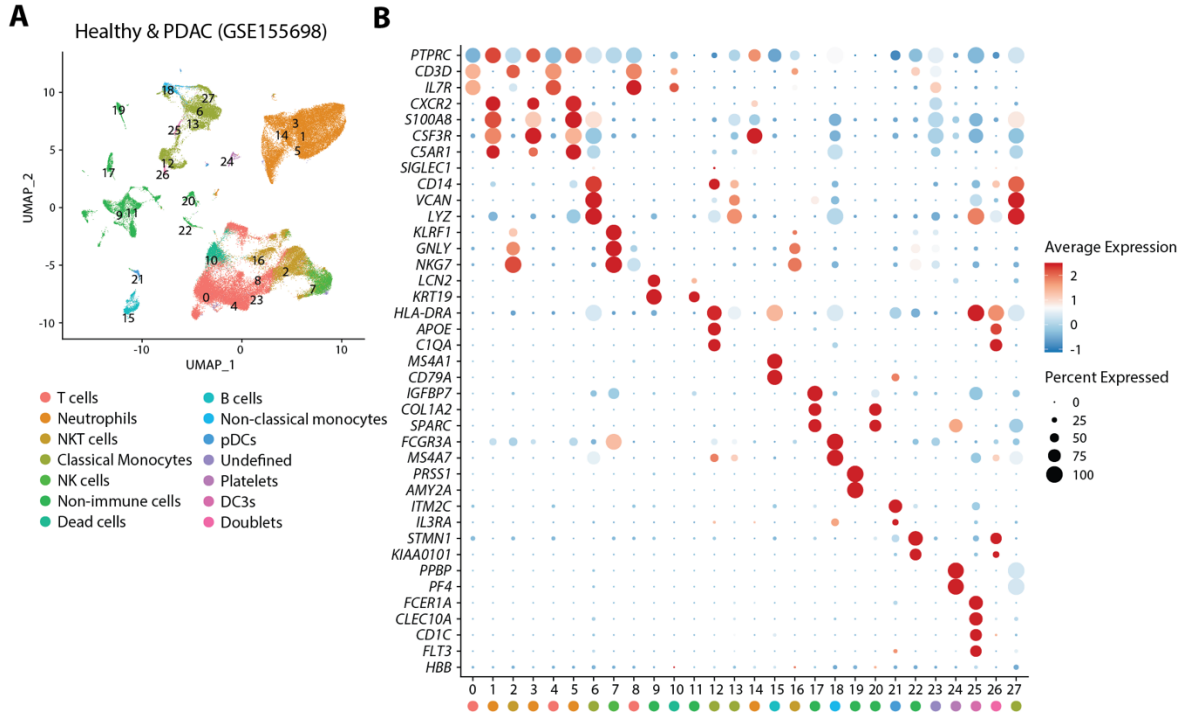

**Figure S4. Analysis of scRNA-seq in PDAC patients.** (A) Analysis of public sc-RNAseq dataset of PBMCs from PDAC ( $n = 12$ ) and healthy controls ( $n = 4$ ) using Seurat algorithm and projected onto UMAP space where cell clusters are indicated. (B) Dotplot showing gene expression of known lineage markers across clusters.

**Figure S5**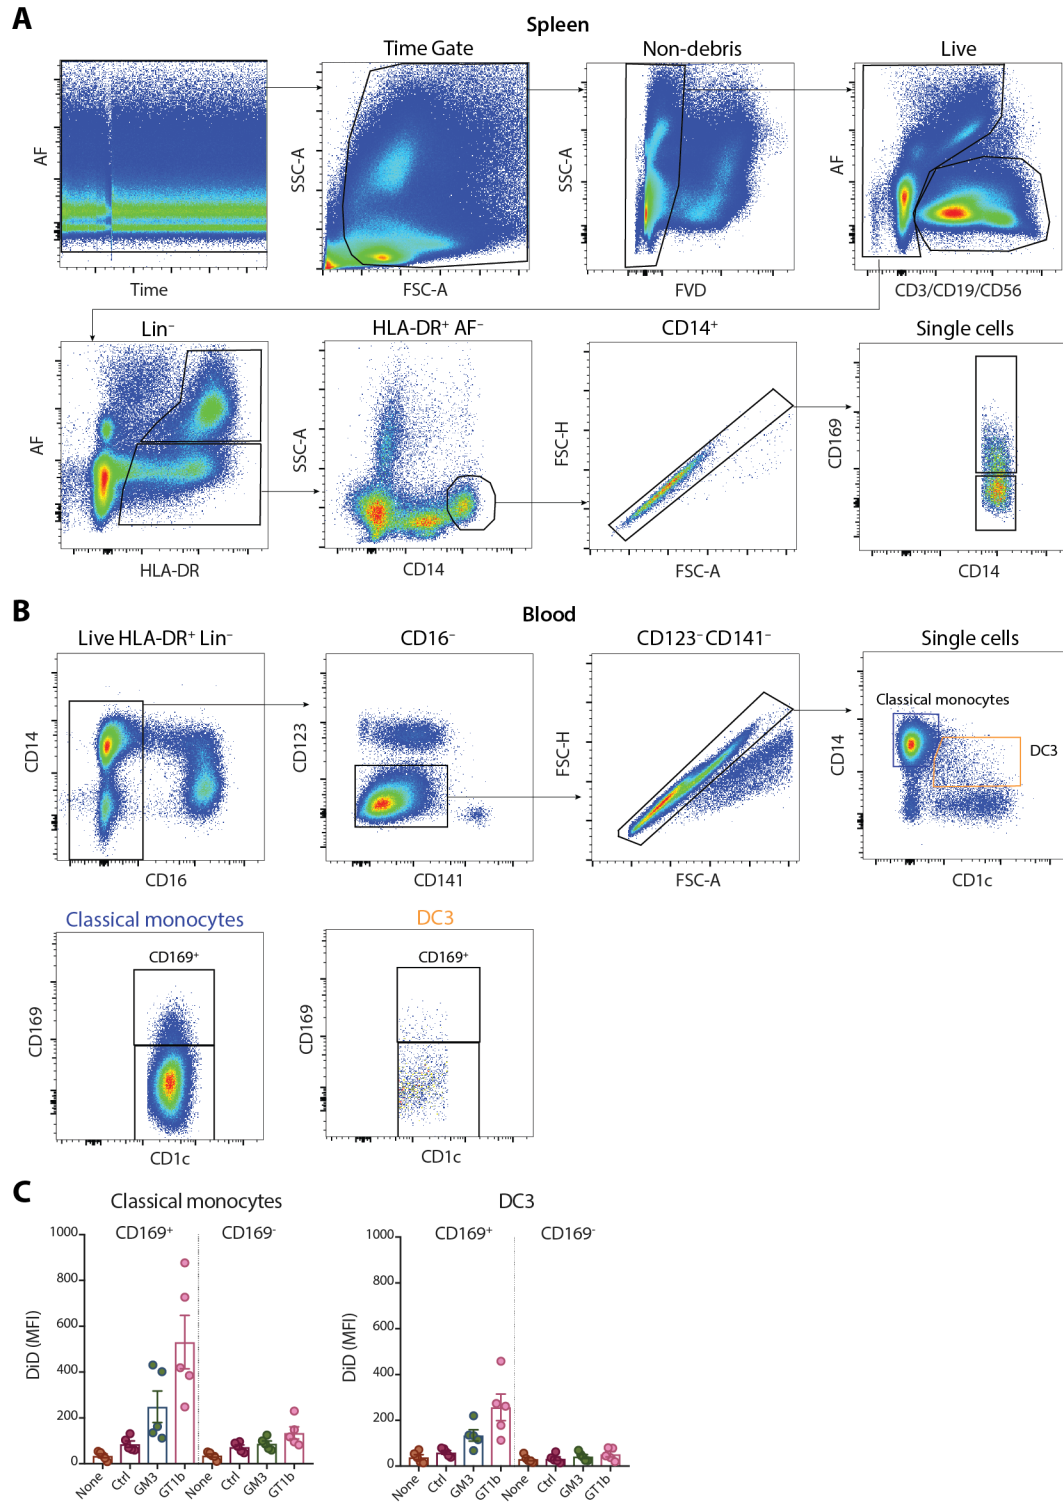

**Figure S5. CD14<sup>+</sup> CD169<sup>+</sup> monocytes uptake of ganglioside-liposomes.** (A) Gating strategy to define CD14<sup>+</sup> monocytes within HLA-DR<sup>+</sup> Lin(CD3/CD19/CD56)<sup>-</sup> cells from digested human spleen. Macrophages were excluded based on autofluorescence (AF). (B) Reanalysis of our published data [5] redefining classical monocytes (CD14<sup>high</sup> CD1c<sup>-</sup>) and DC3 (CD14<sup>int</sup> CD1c<sup>+</sup>), and their CD169

expression. (C) Ganglioside-liposome uptake comparing CD169<sup>+</sup> and CD169<sup>-</sup> fractions of classical monocytes and DC3 populations ( $n = 4$ ).

## 2 Supplementary Tables

### 2.1 Table S1

|               | Size (nm,<br>mean $\pm$ SD) | Polydispersity index<br>(mean $\pm$ SD) | Zeta potential<br>(mean $\pm$ SD) |
|---------------|-----------------------------|-----------------------------------------|-----------------------------------|
| Ctrl/R848/WT1 | 192.9 $\pm$ 0.1             | 0.07 $\pm$ 0.01                         | -53.53 $\pm$ 3.3                  |
| GM3/R848/WT1  | 206.1 $\pm$ 0.1             | 0.07 $\pm$ 0.05                         | -51.37 $\pm$ 6.9                  |

Physical properties of liposomes determined by dynamic light scattering.

### 2.2 Table S2

| Antigen                   | Label        | Clone          | Company     | Catalog #      |
|---------------------------|--------------|----------------|-------------|----------------|
| CD163                     | BV421        | GHI/61         | Biolegend   | 333612         |
| CD83                      | BV421        | HB15e          | Biolegend   | 305323         |
| CD123                     | BV510        | 6H6            | Biolegend   | 302046         |
| HLA-ABC                   | BV510        | W6/32          | Biolegend   | 311435         |
| CD14                      | BV605        | M5E2           | Biolegend   | 301834         |
| CD11c                     | BV650        | B-ly6          | BD          | 563403         |
| HLA-DR                    | BV711        | L243           | Biolegend   | 307644         |
| TNF-a                     | BV750        | MAb11          | BD          | 566359         |
| CD16                      | BV786        | 3G8            | Biolegend   | 302045         |
| CD40                      | BV785        | 5C3            | Biolegend   | 334339         |
| AXL                       | AF488        | 108724R        | R&D         | FAB154RG-100UG |
| CD86                      | FITC         | BU63           | Immunotools | 21480863       |
| CD169                     | PE           | 7-239          | BD          | 565248         |
| CD88                      | PE/Dazzle594 | S5/1           | Biolegend   | 344318         |
| CD3                       | PE-Cy5       | UCHT1          | BD          | 561007         |
| CD19                      | PE-Cy5       | HIB19          | BD          | 561904         |
| CD56                      | PE-Cy5       | B159           | BD          | 560993         |
| CD1c                      | PerCP-ef710  | L161           | eBioscience | 46-0015-42     |
| CD141                     | PE-Cy7       | M80            | Biolegend   | 344109         |
| CD80                      | PE-Cy7       | 2D10           | Biolegend   | 305217         |
| BTLA                      | APC          | MIH26          | Biolegend   | 344509         |
| CD16                      | APC          | LNK16          | Immunotools | 21279166       |
| SIGLEC-6                  | AF700        | 767329         | R&D         | FAB2859RN      |
| Fc $\epsilon$ RI $\alpha$ | APC/Fire750  | AER-37 (CRA-1) | Biolegend   | 334643         |

List of antibodies used in this study.

### 2.3 Table S3

| Gene              | p_val     | avg_log2FC | pct.1 | pct.2 | p_val_adj |
|-------------------|-----------|------------|-------|-------|-----------|
| <i>IFITM1</i>     | 0         | 1.76245363 | 0.871 | 0.149 | 0         |
| <i>IFI44L</i>     | 0         | 1.70910688 | 0.945 | 0.285 | 0         |
| <i>OTOF</i>       | 0         | 1.06278481 | 0.454 | 0.03  | 0         |
| <i>SIGLEC1</i>    | 0         | 1.02993838 | 0.722 | 0.132 | 0         |
| <i>RSAD2</i>      | 0         | 1.01997263 | 0.63  | 0.075 | 0         |
| <i>USP18</i>      | 0         | 0.55124055 | 0.409 | 0.031 | 0         |
| <i>ISG15</i>      | 3.57E-289 | 2.46901138 | 0.984 | 0.497 | 8.31E-285 |
| <i>ANKRD22</i>    | 2.44E-284 | 0.86885427 | 0.515 | 0.072 | 5.70E-280 |
| <i>C15orf48</i>   | 2.23E-271 | 1.7005155  | 0.658 | 0.126 | 5.20E-267 |
| <i>HERC5</i>      | 1.72E-265 | 0.91945116 | 0.628 | 0.115 | 4.00E-261 |
| <i>IFI6</i>       | 1.69E-259 | 2.06458774 | 0.984 | 0.545 | 3.94E-255 |
| <i>XAF1</i>       | 1.49E-243 | 1.56898991 | 0.947 | 0.414 | 3.48E-239 |
| <i>MX1</i>        | 3.15E-238 | 1.44699096 | 0.9   | 0.333 | 7.34E-234 |
| <i>APOBEC3A</i>   | 9.71E-235 | 1.94481898 | 0.955 | 0.424 | 2.26E-230 |
| <i>PTX3</i>       | 1.28E-232 | 1.21868209 | 0.583 | 0.113 | 2.98E-228 |
| <i>EPSTI1</i>     | 3.05E-232 | 1.38666151 | 0.9   | 0.36  | 7.12E-228 |
| <i>IFITM3</i>     | 8.97E-231 | 1.84335761 | 0.992 | 0.775 | 2.09E-226 |
| <i>SERPING1</i>   | 3.93E-219 | 0.85258214 | 0.624 | 0.133 | 9.16E-215 |
| <i>CCL2</i>       | 3.47E-218 | 1.25825614 | 0.264 | 0.024 | 8.08E-214 |
| <i>MX2</i>        | 1.13E-214 | 1.32924094 | 0.922 | 0.397 | 2.63E-210 |
| <i>OASL</i>       | 2.04E-213 | 0.95242384 | 0.716 | 0.187 | 4.75E-209 |
| <i>HCAR3</i>      | 1.82E-199 | 0.70591962 | 0.393 | 0.058 | 4.23E-195 |
| <i>IFI27</i>      | 3.71E-195 | 2.76641143 | 0.652 | 0.177 | 8.64E-191 |
| <i>ATF3</i>       | 1.33E-193 | 1.10643691 | 0.585 | 0.137 | 3.10E-189 |
| <i>ABCA1</i>      | 1.47E-189 | 0.74351951 | 0.599 | 0.136 | 3.42E-185 |
| <i>G0S2</i>       | 9.10E-188 | 1.9761087  | 0.904 | 0.364 | 2.12E-183 |
| <i>AC020656.1</i> | 2.65E-185 | 1.50949139 | 0.998 | 0.837 | 6.18E-181 |
| <i>ETV7</i>       | 9.76E-184 | 0.40037119 | 0.329 | 0.043 | 2.27E-179 |
| <i>ISG20</i>      | 2.11E-183 | 1.07329564 | 0.673 | 0.186 | 4.91E-179 |
| <i>OAS3</i>       | 4.38E-181 | 0.86586041 | 0.712 | 0.21  | 1.02E-176 |
| <i>LY6E</i>       | 7.55E-181 | 1.2838889  | 0.984 | 0.658 | 1.76E-176 |
| <i>NEXN</i>       | 3.24E-179 | 0.56016887 | 0.417 | 0.071 | 7.56E-175 |
| <i>IFIT3</i>      | 5.54E-178 | 0.84660231 | 0.673 | 0.184 | 1.29E-173 |
| <i>IFIT1</i>      | 2.34E-176 | 0.47314567 | 0.399 | 0.065 | 5.45E-172 |
| <i>HCAR2</i>      | 2.67E-176 | 0.40836646 | 0.262 | 0.029 | 6.23E-172 |
| <i>IRF7</i>       | 5.81E-176 | 1.08535135 | 0.847 | 0.359 | 1.35E-171 |
| <i>SPATS2L</i>    | 9.36E-175 | 0.64709452 | 0.479 | 0.097 | 2.18E-170 |
| <i>IFITM2</i>     | 1.41E-171 | 1.12994939 | 0.996 | 0.806 | 3.28E-167 |
| <i>FFAR2</i>      | 2.01E-171 | 0.99258738 | 0.648 | 0.175 | 4.68E-167 |
| <i>PHLDA2</i>     | 9.14E-171 | 0.84104677 | 0.562 | 0.134 | 2.13E-166 |
| <i>MAFF</i>       | 1.55E-165 | 0.6695028  | 0.579 | 0.142 | 3.61E-161 |
| <i>PLAC8</i>      | 1.83E-164 | 1.48473111 | 0.953 | 0.588 | 4.26E-160 |
| <i>ABCG1</i>      | 2.94E-163 | 0.40952633 | 0.321 | 0.046 | 6.86E-159 |
| <i>MARCKS</i>     | 1.14E-162 | 1.40546011 | 0.994 | 0.684 | 2.66E-158 |

|               |           |            |       |       |           |
|---------------|-----------|------------|-------|-------|-----------|
| <i>GBP1</i>   | 2.35E-161 | 1.13335781 | 0.867 | 0.361 | 5.48E-157 |
| <i>FCGR1B</i> | 9.64E-160 | 0.86468437 | 0.677 | 0.209 | 2.25E-155 |
| <i>PLEK</i>   | 4.43E-157 | 1.17822648 | 0.992 | 0.788 | 1.03E-152 |
| <i>BCL2A1</i> | 1.11E-155 | 1.36652511 | 0.951 | 0.552 | 2.59E-151 |
| <i>SAMD9L</i> | 9.65E-153 | 0.80477496 | 0.687 | 0.216 | 2.25E-148 |
| <i>CARD16</i> | 1.48E-149 | 1.10593909 | 0.973 | 0.707 | 3.45E-145 |

List of top 50 genes of cluster 22 as compared to other monocyte populations (cluster 0, 5, 9, and 10) obtained using Seurat FindAllMarkers function. avg\_log2FC = average log2 fold change. The percentages of cells where the gene is detected in cluster 22, and where the gene is detected on average in the other clusters, are shown as pct.1 and pct.2, respectively. p\_val\_adj = adjusted P value based on Bonferroni's correction.

### 3 References

- [1] H.M. Kang, M. Subramaniam, S. Targ, M. Nguyen, L. Maliskova, E. McCarthy, E. Wan, S. Wong, L. Byrnes, C.M. Lanata, R.E. Gate, S. Mostafavi, A. Marson, N. Zaitlen, L.A. Criswell, and C.J. Ye, Multiplexed droplet single-cell RNA-sequencing using natural genetic variation. *Nat Biotechnol* 36 (2018) 89-94.
- [2] T. Stuart, A. Butler, P. Hoffman, C. Hafemeister, E. Papalexi, W.M. Mauck, 3rd, Y. Hao, M. Stoeckius, P. Smibert, and R. Satija, Comprehensive Integration of Single-Cell Data. *Cell* 177 (2019) 1888-1902 e21.
- [3] M. Girard, J.C. Law, M.I. Edilova, and T.H. Watts, Type I interferons drive the maturation of human DC3s with a distinct costimulatory profile characterized by high GITRL. *Sci Immunol* 5 (2020).
- [4] A. Saris, T.D. Reijnders, E.J. Nossent, A.R. Schuurman, J. Verhoeff, S.V. Asten, H. Bontkes, S. Blok, J. Duitman, H.J. Bogaard, L. Heunks, R. Lutter, T. van der Poll, J.J. Garcia Vallejo, D.c. Art, and U.M.C.C.s.g. the Amsterdam, Distinct cellular immune profiles in the airways and blood of critically ill patients with COVID-19. *Thorax* (2021).
- [5] A.J. Affandi, J. Grabowska, K. Olesek, M. Lopez Venegas, A. Barbaria, E. Rodriguez, P.P.G. Mulder, H.J. Pijffers, M. Ambrosini, H. Kalay, T. O'Toole, E.S. Zwart, G. Kazemier, K. Nazmi, F.J. Bikker, J. Stockl, A.J.M. van den Eertwegh, T.D. de Gruijl, G. Storm, Y. van Kooyk, and J.M.M. den Haan, Selective tumor antigen vaccine delivery to human CD169(+) antigen-presenting cells using ganglioside-liposomes. *Proc Natl Acad Sci U S A* 117 (2020) 27528-27539.
